# Supplementary material for: Overexpression of pPLAIIIγ in Arabidopsis Reduced Xylem Lignification of Stem by Regulating Peroxidases
Source: MDPI journal article supplement (doi:10.3390/plants11020200), 2022-01-13
Supplement: s1 [file s1]

**Table S1.** List of DNA primers used for confirmation of gene insertion and qPCR.

| Gene                              | Accession No. | Annotation                                            | Primers used (5'-3')                                                     |
|-----------------------------------|---------------|-------------------------------------------------------|--------------------------------------------------------------------------|
| <i>pPLAIII<math>\alpha</math></i> | At2g39220     | pPLAIII $\alpha$ -F<br>pPLAIII $\alpha$ -R            | GACGGATATGCAAGAACCGAGCAT<br>TTCGAACCTGACCCACCCGAACCA                     |
| <i>pPLAIII<math>\beta</math></i>  | At3g54950     | pPLAIII $\beta$ -F<br>pPLAIII $\beta$ -R              | GCG GCT TCC AAG TCG GCG AAT GAT<br>CTT AGC CGT CCC GGA ACA ACA ACC       |
| <i>pPLAIII<math>\gamma</math></i> | At4g29800     | pPLAIII $\gamma$ -F<br>pPLAIII $\gamma$ -R            | TC GGT ACC GTC TAA AAG CTA ACG ATT<br>GG CCT AGG TCT ATC TTT AGA TAT GAG |
| <i>pPLAIII<math>\gamma</math></i> | At4g29800     | pPLAIII $\gamma$ -KpnI-F<br>pPLAIII $\gamma$ -AvrII-R | GTC CAA CGT TAT CAA CGG CTC GAT<br>TCC TCC ACT TCC GCT CCC TGA TCT       |
| <i>pPLAIII<math>\delta</math></i> | At3g63200     | pPLAIII $\delta$ -F<br>pPLAIII $\delta$ -R            | ACA TTT TCA CAA AGC TTG AAC AGA<br>CCA AAA CCC TCT CCA TGC TCT TCC       |
| <i><math>\beta</math>-actin</i>   | At5g09810     | actin-2F<br>actin-2R                                  | GTGTGTCTTGTCTTATCTGGTTCG<br>AATAGCTGCATTGTCACCCGATACT                    |
| <i>MYB58</i>                      | At1g16490     | MYB58-F<br>MYB58-R                                    | CCAGAGAACAGAGCTCTTCAAGAG<br>ATGTATGAGGAGCTCGTAACTCTC                     |
| <i>MYB63</i>                      | At1g79180     | MYB63-F<br>MYB63-R                                    | GAACAGCTCAGGCTCAAGAGCAAC<br>ATGTATCATGAGCTCGTAGTTCTT                     |
| <i>PAL1</i>                       | At2g37040     | PAL1-F<br>PAL1-R                                      | CAACGTACCCGTTGATTTCAG<br>TCCTCGAAAGCTCCAATCTT                            |
| <i>4CL</i>                        | At1g51680     | 4CL-F<br>4CL-R                                        | TCAACCCGGTGAGATTTGTA<br>TCGTCATCGATCAATCCAAT                             |
| <i>HCT</i>                        | At5g48930     | HCT-F<br>HCT-R                                        | CTCTTTCCAAAGCCCTTGTC<br>TCAGCCACAACGAAGAGAAC                             |
| <i>COMT1</i>                      | At5g54160     | COMT1-F<br>COMT1-R                                    | GTCGATTGCATTATGTTGGC<br>AGCCTGATGCTTTGGCTAAT                             |
| <i>CCR1</i>                       | At1g15950     | CCR1-F<br>CCR1-R                                      | TCCAGATGATCCGAAGAACA<br>CGCCTTAAGAGCCTCGTAGT                             |
| <i>F5H2</i>                       | At5g04330     | F5H2-F<br>F5H2-R                                      | ATCATGGATGTGATGTTTCGG<br>ATCTCGGTTAGCACCCATTC                            |
| <i>CESA1</i>                      | At4g32410     | CESA1-F<br>CESA1-R                                    | CCC ATG GCC ATA CGG TTT CT<br>ACA GGT TGC CGT GGA TCA AT                 |
| <i>CESA3</i>                      | At5g05170     | CESA3-F<br>CESA3-R                                    | TAC TCG TGG GAA GGG AGA GG<br>CAG AGA GGC GTT CAG GTG AG                 |
| <i>CDSA6</i>                      | At5g64740     | CESA6-F<br>CESA6-R                                    | TTC ACT TGG TGG TCA TGG CA<br>ACC ATA GGC CTT GGA TGT GC                 |
| <i>CESA7</i>                      | At5g17420     | CESA7-F<br>CESA7-R                                    | GTTTTGCGTTGGGCACTTG<br>AGTTTGCCTCCTTTGTAGCCATA                           |
| <i>CESA8</i>                      | At4g18780     | CESA8-F<br>CESA8-R                                    | TCTTTGTGGCTTGTGATGAGTGT<br>CAACGCAAGCAAATTCCTTCGA                        |
| <i>COBRA</i>                      | At5g60920     | COBRA-F<br>COBRA-R                                    | GACAATTGCGTCATGCCTCC<br>GGAACCACCGTTGGGAAGAA                             |
| <i>PRX42</i>                      | At4g21960     | PRX42-F<br>PRX42-R                                    | AAGCAGGACGGATATGCTCG<br>AGTGAGTTCTTCCCACGCTG                             |
| <i>PRX52</i>                      | At5g05340     | PRX52-F<br>PRX52-R                                    | GCTTTGTCAACGGATGCGAC<br>CTGAATTGCGGTTTGGAGCC                             |
| <i>PRX64</i>                      | At5g42180     | PRX64-F<br>PRX64-R                                    | GGAGGTTGACCCAACACTAAA<br>TCACGGTTCCATCCATGTTC                            |
| <i>PRX71</i>                      | At5g64120     | PRX71-F<br>PRX71-R                                    | GGGACGTAGAGATGGTAGAGTT<br>GACGACGAGATCACGAGTATTG                         |
| <i>PRX72</i>                      | At5g66390     | PRX72-F<br>PRX72-R                                    | TCA GCG AGA AAC GAT CAA AC<br>CCA AGA TAT CAG CGC AAG AA                 |
